# Supplementary material
Source: Springer Nature journal article supplement (https://www.springermedizin.de/resource/supplementary/13223_2010_97_MOESM1_ESM.pdf/9597188)
Supplement: MOESM1 [file 9597188]

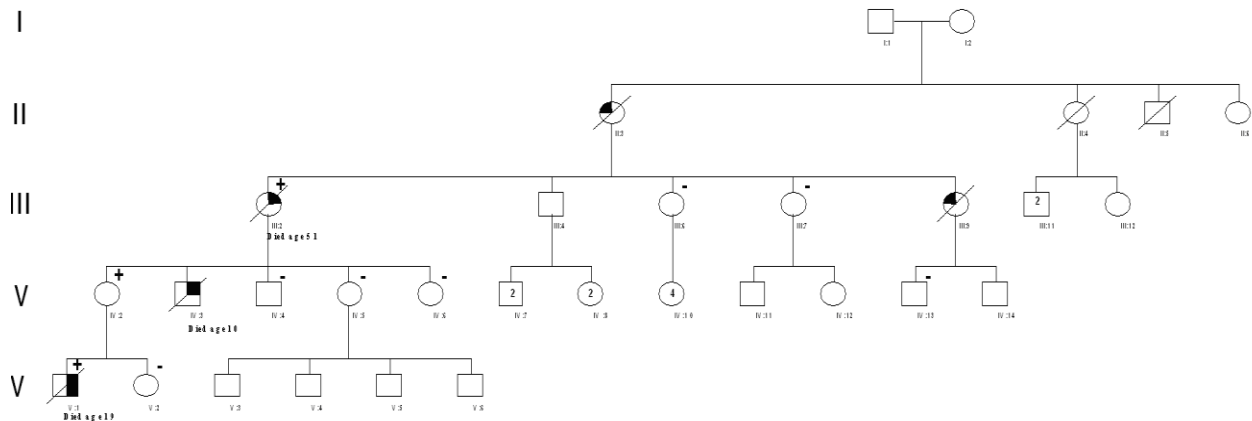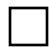

Unaffected male

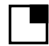

Non Hodgkins Lymphoma

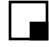

Fulminant infectious mononucleosis

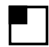

Myocardial infarction

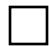

+ SH2D1A mutation positive

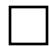

- SH2D1A mutation negative
